# Supplementary material for: CuO nanothorn arrays on three-dimensional copper foam as an ultra-highly sensitive and efficient nonenzymatic glucose sensor
Source: Royal Society of Chemistry journal article supplement (doi:10.1039/c5ra24579f), 2016-01-01
Supplement: c5ra24579f1.pdf [file c5ra24579f1.pdf]

## Supporting Information

### CuO nanothorn arrays on three-dimensional copper foam as ultra-highly sensitive and efficient nonenzymatic glucose sensor

Wangdong Lu,<sup>ab</sup> Yujing Sun<sup>a</sup>, Haichao Dai,<sup>ab</sup> Pengjuan Ni,<sup>ab</sup> Shu Jiang,<sup>ab</sup> Yilin Wang,<sup>ab</sup> Zhen Li,<sup>ab</sup> and Zhuang Li<sup>\*a</sup>

<sup>a</sup>State Key Laboratory of Electroanalytical Chemistry, Changchun Institute of Applied Chemistry, Changchun, 130022, Jilin, P. R. China.

<sup>b</sup>University of Chinese Academy of Sciences, Beijing, 100049, P. R. China

E-mail: zli@ciac.jl.cn; Fax: +86 431 85262057; Tel: +86 431 85262057

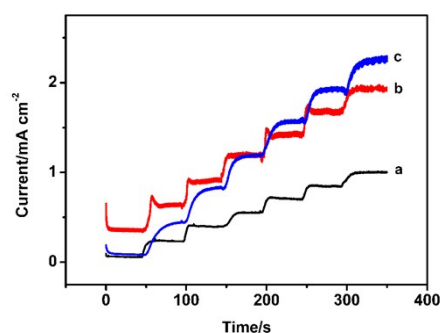

**Fig. S1** Amperometric responses of the Cu foam (a), NTs-Cu(OH)<sub>2</sub>/Cu foam (b), NTs-CuO/Cu foam at 0.5 V (vs. Ag/AgCl) in 0.1 M NaOH solution with successive addition of 50  $\mu$ M glucose.

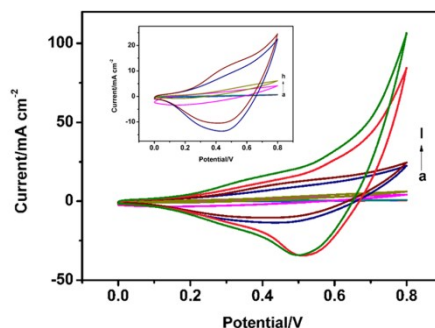

**Fig. S2** Electroanalytical effect of different concentrations of NaOH ((a) 0.1 mM, (b) 1 mM, (c) 10 mM, (d) 0.1 M, (e) 1 M) in the presence of 1 mM glucose. Inset shows the enlarged electroanalytical effect of different concentrations of NaOH (a) 0.1 mM, (b) 1 mM, (c) 10 mM, (d) 0.1 M in the presence of 1 mM glucose.
